# Supplementary material for: Polychlorinated dibenzo-p-dioxins and dibenzofurans formed from sucralose at high temperatures
Source: PubMed Central journal article supplement — Sci Rep. 2013 Oct 15;3:2946. doi: 10.1038/srep02946 (PMC3796739; doi:10.1038/srep02946), 2013-10-15
Supplement: srep02946-s1.pdf [file srep02946-s1.pdf]

Supplementary Table 1S The ions monitored in the gas chromatography-high resolution mass spectrometry analysis of the polychlorinated dibenzo-p-dioxins and dibenzofurans (PCDD/Fs).

| <i>congeners</i>              | Trace 1  | Trace 2  |
|-------------------------------|----------|----------|
| 2378-TCDF                     | 303.9016 | 305.8987 |
| 12378-PeCDF                   | 339.8597 | 341.8567 |
| 23478-PeCDF                   | 339.8597 | 341.8567 |
| 123478-HxCDF                  | 373.8208 | 375.8178 |
| 123678-HxCDF                  | 373.8208 | 375.8178 |
| 234678-HxCDF                  | 373.8208 | 375.8178 |
| 123789-HxCDF                  | 373.8208 | 375.8178 |
| 1234678-HpCDF                 | 407.7818 | 409.7789 |
| 1234789-HpCDF                 | 407.7818 | 409.7789 |
| OCDF                          | 441.7428 | 443.7399 |
| 2378-TCDD                     | 319.8965 | 321.8936 |
| 12378-PeCDD                   | 355.8546 | 357.8516 |
| 123478-HxCDD                  | 389.8157 | 391.8127 |
| 123678-HxCDD                  | 389.8157 | 391.8127 |
| 123789-HxCDD                  | 389.8157 | 391.8127 |
| 1234678-HpCDD                 | 423.7766 | 425.7737 |
| OCDD                          | 457.7377 | 459.7348 |
| <sup>13</sup> C-2378-TCDF     | 315.9419 | 317.9389 |
| <sup>13</sup> C-12378-PeCDF   | 351.9000 | 353.8970 |
| <sup>13</sup> C-23478-PeCDF   | 351.9000 | 353.8970 |
| <sup>13</sup> C-123478-HxCDF  | 383.8639 | 385.8610 |
| <sup>13</sup> C-123678-HxCDF  | 383.8639 | 385.8610 |
| <sup>13</sup> C-234678-HxCDF  | 383.8639 | 385.8610 |
| <sup>13</sup> C-123789-HxCDF  | 383.8639 | 385.8610 |
| <sup>13</sup> C-1234678-HpCDF | 417.8253 | 419.8220 |
| <sup>13</sup> C-1234789-HpCDF | 417.8253 | 419.8220 |
| <sup>13</sup> C-2378-TCDD     | 331.9368 | 333.9339 |
| <sup>13</sup> C-12378-PeCDD   | 367.8949 | 369.8919 |
| <sup>13</sup> C-123478-HxCDD  | 401.8559 | 403.8529 |
| <sup>13</sup> C-123678-HxCDD  | 401.8559 | 403.8529 |
| <sup>13</sup> C-1234678-HpCDD | 435.8169 | 437.8140 |
| <sup>13</sup> C-OCDD          | 469.7779 | 471.7750 |
| <sup>13</sup> C-1234-TCDD     | 331.9368 | 333.9339 |
| <sup>13</sup> C-123789-HxCDD  | 401.8559 | 403.8529 |

| <i>homologues</i> | Trace 1  | Trace 2  |
|-------------------|----------|----------|
| TCDF              | 303.9016 | 305.8987 |
| TCDD              | 319.8965 | 321.8936 |
| PeCDF             | 339.8597 | 341.8567 |
| PeCDD             | 355.8546 | 357.8516 |
| HxCDF             | 373.8208 | 375.8178 |
| HxCDD             | 389.8157 | 391.8127 |
| HpCDF             | 407.7818 | 409.7789 |
| HpCDD             | 423.7766 | 425.7737 |

Supplementary Table 2S The ions monitored in the gas chromatography-mass spectrometry analysis of the polycyclic aromatic hydrocarbons (PAHs).

| Analyte                                 | Trace 1 | Trace 2 |
|-----------------------------------------|---------|---------|
| Naphthalene                             | 128     | 127     |
| Acenaphthylene                          | 152     | 153     |
| Acenaphhene                             | 154     | 153     |
| Fluorene                                | 166     | 165     |
| Phenanthrene                            | 178     | 176     |
| Anthracene                              | 178     | 176     |
| Fluoranthene                            | 202     | 101     |
| Pyrene                                  | 202     | 101     |
| Benzo(a)anthracene                      | 228     | 114     |
| Chrysene                                | 228     | 114     |
| Benzo(b)fluoranthene                    | 252     | 126     |
| Benzo(k)fluoranthene                    | 252     | 126     |
| Benzo(e)pyrene                          | 252     | 126     |
| Benzo(a)pyrene                          | 252     | 126     |
| Perylene                                | 252     | 126     |
| Indeno(1,2,3-cd)pyrene                  | 276     | 138     |
| Dibenz(ah)anthracene                    | 278     | 139     |
| Benzo(ghi)perylene                      | 276     | 138     |
| d <sub>8</sub> -Naphthalene             | 136     | 68      |
| d <sub>8</sub> -Acenaphthylene          | 160     |         |
| d <sub>10</sub> -Acenaphthene           | 164     |         |
| d <sub>10</sub> -Fluorene               | 176     |         |
| d <sub>10</sub> -Phenanthrene           | 188     | 94      |
| d <sub>10</sub> -Anthracene             | 188     | 94      |
| d <sub>10</sub> -Fluoranthene           | 212     | 106     |
| d <sub>10</sub> -Pyrene                 | 212     | 106     |
| d <sub>12</sub> -Benzo(a)anthracene     | 240     | 120     |
| d <sub>12</sub> -Chrysene               | 240     | 120     |
| d <sub>12</sub> -Benzo(b)fluoranthene   | 264     | 132     |
| d <sub>12</sub> -Benzo(k)fluoranthene   | 264     | 132     |
| d <sub>12</sub> -Benzo(e)pyrene         | 264     | 132     |
| d <sub>12</sub> -Benzo(a)pyrene         | 264     | 132     |
| d <sub>12</sub> -Perylene               | 264     | 132     |
| d <sub>12</sub> -Indeno(1,2,3-cd)pyrene | 288     |         |

| Analyte                               | Trace 1 | Trace 2 |
|---------------------------------------|---------|---------|
| d <sub>14</sub> -Dibenz(ah)anthracene | 292     |         |
| d <sub>12</sub> -Benzo(ghi)perylene   | 288     |         |

Supplementary Table 3S The ions monitored in the gas chromatography-mass spectrometry analysis of the chlorobenzenes (CBzs).

| Analyte               | Trace 1 | Trace 2 |
|-----------------------|---------|---------|
| TCBz <sup>a</sup>     | 216     | 218     |
| PeCBz <sup>b</sup>    | 250     | 252     |
| HxCBz <sup>c</sup>    | 284     | 286     |
| <sup>13</sup> C-TCBz  | 224     | 226     |
| <sup>13</sup> C-PeCBz | 258     | 260     |
| <sup>13</sup> C-HxCBz | 294     | 296     |

<sup>a</sup> Tetrachlorobenzene

<sup>b</sup> Pentachlorobenzene

<sup>c</sup> Hexachlorobenzene
